# Supplementary material for: Brazilian kefir fraction mitigates the Alzheimer-like phenotype in Drosophila melanogaster with β-amyloid overexpression model
Source: PubMed Central journal article supplement (PMC11513133; doi:10.1038/s41598-024-76601-9), 2024-10-26
Supplement: 41598_2024_76601_MOESM1_ESM.pdf [file 41598_2024_76601_MOESM1_ESM.pdf]

Supplementary Material

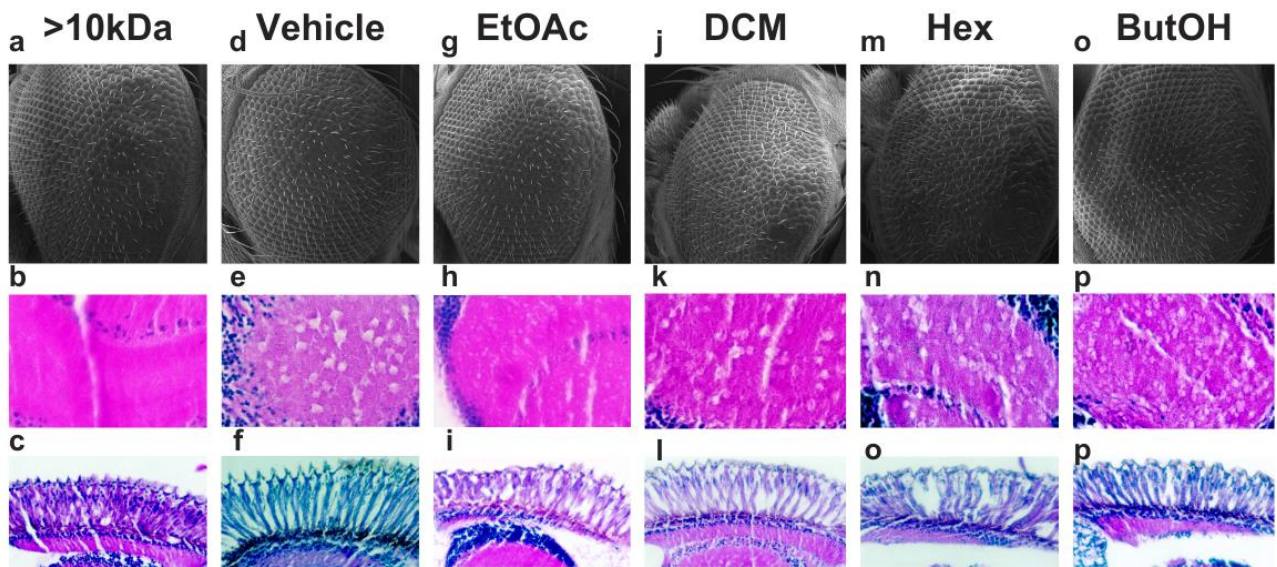

**S1: Effects of kefir fractions and solvents in the *Drosophila melanogaster* Alzheimer's model ( $A\beta_{42}$ ) on the morphologies of ommatidia, medulla, and retina.** The representative images show: (a, d, g, j, m, o) scanning electron micrographs of the compound eye; (b, e, h, k, n, p) histologic sections of the medulla; and (c, f, i, l, o, p) histological sections of the retina of *Drosophila melanogaster* treated with the different fractions (>10 kDa, vehicle, ethyl acetate [EtOAc], dichloromethane [DCM], hexane [Hex] and butanol [ButOH]) 1-2 days post eclosion.
